# Supplementary material for: Effect of Water Deficit on Germination, Growth and Biochemical Responses of Four Potentially Invasive Ornamental Grass Species
Source: MDPI journal article supplement (doi:10.3390/plants12061260), 2023-03-10
Supplement: s1 [file s1]

**Table S1.** Parameters of germination with mean values  $\pm$  SE of four invasive grass species after 30 days of applied osmotic stress and after 20 days of recovery treatment after 20 days. Different lowercase letters within the bars indicate significant differences between treatments within one species, according to Tukey post-hoc test ( $p < 0.05$ ). Abbreviations: RGP, reduction germination percentage; FGD, first germination day; LGD, last germination day; TSG, time spread germination; SE, speed of emergence; GI, germination index. n.g., no germination

| Parameter  | Assay       | Treatment | <i>C. citratus</i> | <i>C. selloana</i> | <i>P. alopecuroides</i> | <i>P. setaceum</i> |
|------------|-------------|-----------|--------------------|--------------------|-------------------------|--------------------|
| RGP (%)    | Germination | -0.25     | 8.6 $\pm$ 1.0 a    | 17.4 $\pm$ 2.2 ab  | -1.3 $\pm$ 2.2 a        | -2.3 $\pm$ 2.2 a   |
|            |             | -0.5      | 11.7 $\pm$ 3.0 a   | 29.1 $\pm$ 2.2 bc  | 17.9 $\pm$ 1.1 b        | 5.7 $\pm$ 4.0 a    |
|            |             | -0.75     | 48.2 $\pm$ 7.1 b   | 53.5 $\pm$ 9.9 c   | 6.7 $\pm$ 2.7 ab        | 69 $\pm$ 4.7 b     |
|            |             | -1        | 100.0 $\pm$ 0.0 c  | 79.1 $\pm$ 3.0 d   | 46.7 $\pm$ 4.4 c        | 95.4 $\pm$ 2.7 c   |
| FGD (days) | Germination | C         | 1.0 $\pm$ 0.0 a    | 2.0 $\pm$ 0.0 a    | 1.0 $\pm$ 0.0 a         | 1.0 $\pm$ 0.0 a    |
|            |             | -0.25     | 2.0 $\pm$ 0.0 b    | 2.0 $\pm$ 0.0 a    | 1.2 $\pm$ 0.3 a         | 2.0 $\pm$ 0.0 a    |
|            |             | -0.5      | 2.7 $\pm$ 0.3 c    | 3.5 $\pm$ 0.3 ab   | 2 b                     | 2.0 $\pm$ 0.0 a    |
|            |             | -0.75     | 3.2 $\pm$ 0.3 d    | 4.5 $\pm$ 0.3 b    | 2 b                     | 4.7 $\pm$ 0.5 b    |
|            |             | -1        | n.g.               | 9.5 $\pm$ 1.2 c    | 2.2 $\pm$ 0.3 b         | 8.2 $\pm$ 4.8 c    |
|            | Recovery    | -0.25     | -                  | 10.7 $\pm$ 3.8     | -                       | -                  |
|            |             | -0.5      | 1.0                | 2.0                | -                       | 1.0                |
|            |             | -0.75     | 1.0                | 2.0                | 1.3 $\pm$ 0.3           | 1.0                |
|            |             | -1        | 1.0                | 3.0                | 1.0                     | 1.0                |
| LGD (days) | Germination | C         | 5.5 $\pm$ 0.9 a    | 10.5 $\pm$ 0.5 a   | 2.2 $\pm$ 0.3 a         | 8.2 $\pm$ 3.7 a    |
|            |             | -0.25     | 7.2 $\pm$ 1.3 a    | 15.5 $\pm$ 1.7 ab  | 4.2 $\pm$ 0.6 a         | 7.2 $\pm$ 1.4 a    |
|            |             | -0.5      | 13.5 $\pm$ 2.5 ab  | 29.2 $\pm$ 0.3 b   | 8.7 $\pm$ 3.1 ab        | 13.5 $\pm$ 4.5 a   |
|            |             | -0.75     | 22 $\pm$ 2.7 b     | 20 $\pm$ 3.5 b     | 9.2 $\pm$ 1.7 ab        | 14.5 $\pm$ 2.6 a   |
|            |             | -1        | n.g.               | 20 $\pm$ 1.0 c     | 12.5 $\pm$ 1.6 b        | 8.7 $\pm$ 5.1 a    |
|            | Recovery    | -0.25     | -                  | 14.7 $\pm$ 2.8     | -                       | -                  |
|            |             | -0.5      | 3.0 $\pm$ 2.0      | 6.7 $\pm$ 2.6      | -                       | 1.7 $\pm$ 0.3      |
|            |             | -0.75     | 1.7 $\pm$ 0.3      | 9.7 $\pm$ 1.3      | 1.3 $\pm$ 0.3           | 5.7 $\pm$ 2.9      |
|            |             | -1        | 3.3 $\pm$ 0.3      | 8 $\pm$ 1.7        | 3.8 $\pm$ 1.1           | 7 $\pm$ 2.1        |
| TSG (days) | Germination | C         | 4.5 $\pm$ 0.9 a    | 8.5 $\pm$ 0.5 a    | 1.2 $\pm$ 0.3 a         | 7.2 $\pm$ 3.7 a    |
|            |             | -0.25     | 5.2 $\pm$ 1.3 a    | 13.5 $\pm$ 1.7 a   | 3 $\pm$ 0.4 ab          | 5.2 $\pm$ 1.4 a    |
|            |             | -0.5      | 10.7 $\pm$ 2.3 ab  | 25.7 $\pm$ 0.3 b   | 6.7 $\pm$ 2.9 ab        | 11.5 $\pm$ 4.5 a   |
|            |             | -0.75     | 18.7 $\pm$ 3.7 b   | 15.5 $\pm$ 3.6 a   | 7.2 $\pm$ 1.7 ab        | 9.7 $\pm$ 2.3 a    |
|            |             | -1        | n.g.               | 10.5 $\pm$ 2.0 a   | 10.2 $\pm$ 1.5 b        | 0.7 $\pm$ 0.5 a    |
|            | Recovery    | -0.25     | -                  | 4.7 $\pm$ 3.7      | -                       | -                  |
|            |             | -0.5      | 2.7 $\pm$ 1.7      | 5 $\pm$ 2.3        | -                       | 1.0                |
|            |             | -0.75     | 1.0                | 7.7 $\pm$ 1.3      | 1.0                     | 5 $\pm$ 2.6        |
|            |             | -1        | 2.25 $\pm$ 0.3     | 5 $\pm$ 1.7        | 2.75 $\pm$ 1.1          | 6 $\pm$ 2.1        |
| SE         | Germination | C         | 20.9 $\pm$ 1.6 a   | 48.8 $\pm$ 3.9 c   | 76 $\pm$ 6.2 c          | 67.4 $\pm$ 2.9 b   |
|            |             | -0.25     | 48.2 $\pm$ 3.9 a   | 14.3 $\pm$ 3.9 ab  | 28.1 $\pm$ 14.0 ab      | 81 $\pm$ 3.0 b     |
|            |             | -0.5      | 26.6 $\pm$ 7.4 a   | 8.1 $\pm$ 1.5 a    | 74 $\pm$ 2.2 c          | 23.7 $\pm$ 8.2 a   |
|            |             | -0.75     | 23.2 $\pm$ 10.9 a  | 13.1 $\pm$ 1.8 a   | 57.2 $\pm$ 2.9 bc       | 22.5 $\pm$ 3.0 a   |
|            |             | -1        | n.g.               | 28.7 $\pm$ 5.1 b   | 10.2 $\pm$ 0.9 a        | 37.5 $\pm$ 23.9 b  |
|            | Recovery    | -0.25     | -                  | 83.3 $\pm$ 16.7    | -                       | -                  |
|            |             | -0.5      | 83.3 $\pm$ 16.7    | 77.7 $\pm$ 14.7    | -                       | 66.7 $\pm$ 16.7    |
|            |             | -0.75     | 90.7 $\pm$ 4.9     | 51.7 $\pm$ 6.4     | 100.0                   | 84.6 $\pm$ 8.5     |
|            |             | -1        | 50.7 $\pm$ 9.6     | 72.9 $\pm$ 4.7     | 53.6 $\pm$ 13.4         | 77.8 $\pm$ 7.7     |
| GI         | Germination | C         | 14 $\pm$ 0.7 d     | 8.1 $\pm$ 0.6 d    | 16.4 $\pm$ 0.5 d        | 17.8 $\pm$ 1.3 d   |
|            |             | -0.25     | 8.5 $\pm$ 0.2 c    | 5.3 $\pm$ 0.2 c    | 9.4 $\pm$ 0.4 c         | 10.1 $\pm$ 0.1 c   |
|            |             | -0.5      | 5.3 $\pm$ 0.2 b    | 1.8 $\pm$ 0.1 b    | 8.2 $\pm$ 0.2 c         | 6.4 $\pm$ 0.6 b    |
|            |             | -0.75     | 2.2 $\pm$ 0.3 a    | 1 $\pm$ 0.2 ab     | 6.7 $\pm$ 0.1 b         | 0.9 $\pm$ 0.2 a    |
|            |             | -1        | n.g.               | 0.3 $\pm$ 0.04 a   | 2 $\pm$ 0.1 a           | 0.1 $\pm$ 0.03 a   |
|            | Recovery    | -0.25     | -                  | 0.2 $\pm$ 0.1      | -                       | -                  |
|            |             | -0.5      | 1.0 $\pm$ 0.03     | 1.6 $\pm$ 0.1      | -                       | 1.3 $\pm$ 0.2      |

|       |                |               |               |                |
|-------|----------------|---------------|---------------|----------------|
| -0.75 | $8.5 \pm 1.4$  | $4.1 \pm 0.3$ | $1.5 \pm 0.5$ | $15 \pm 1$     |
| -1    | $16.0 \pm 1.4$ | $4.1 \pm 0.4$ | $5.8 \pm 0.7$ | $20.5 \pm 1.3$ |

---
